# Supplementary material
Source: PubMed Central journal article supplement (PMC3905573)
Supplement: NIHMS526024-supplement-02.pdf [file NIHMS526024-supplement-02.pdf]

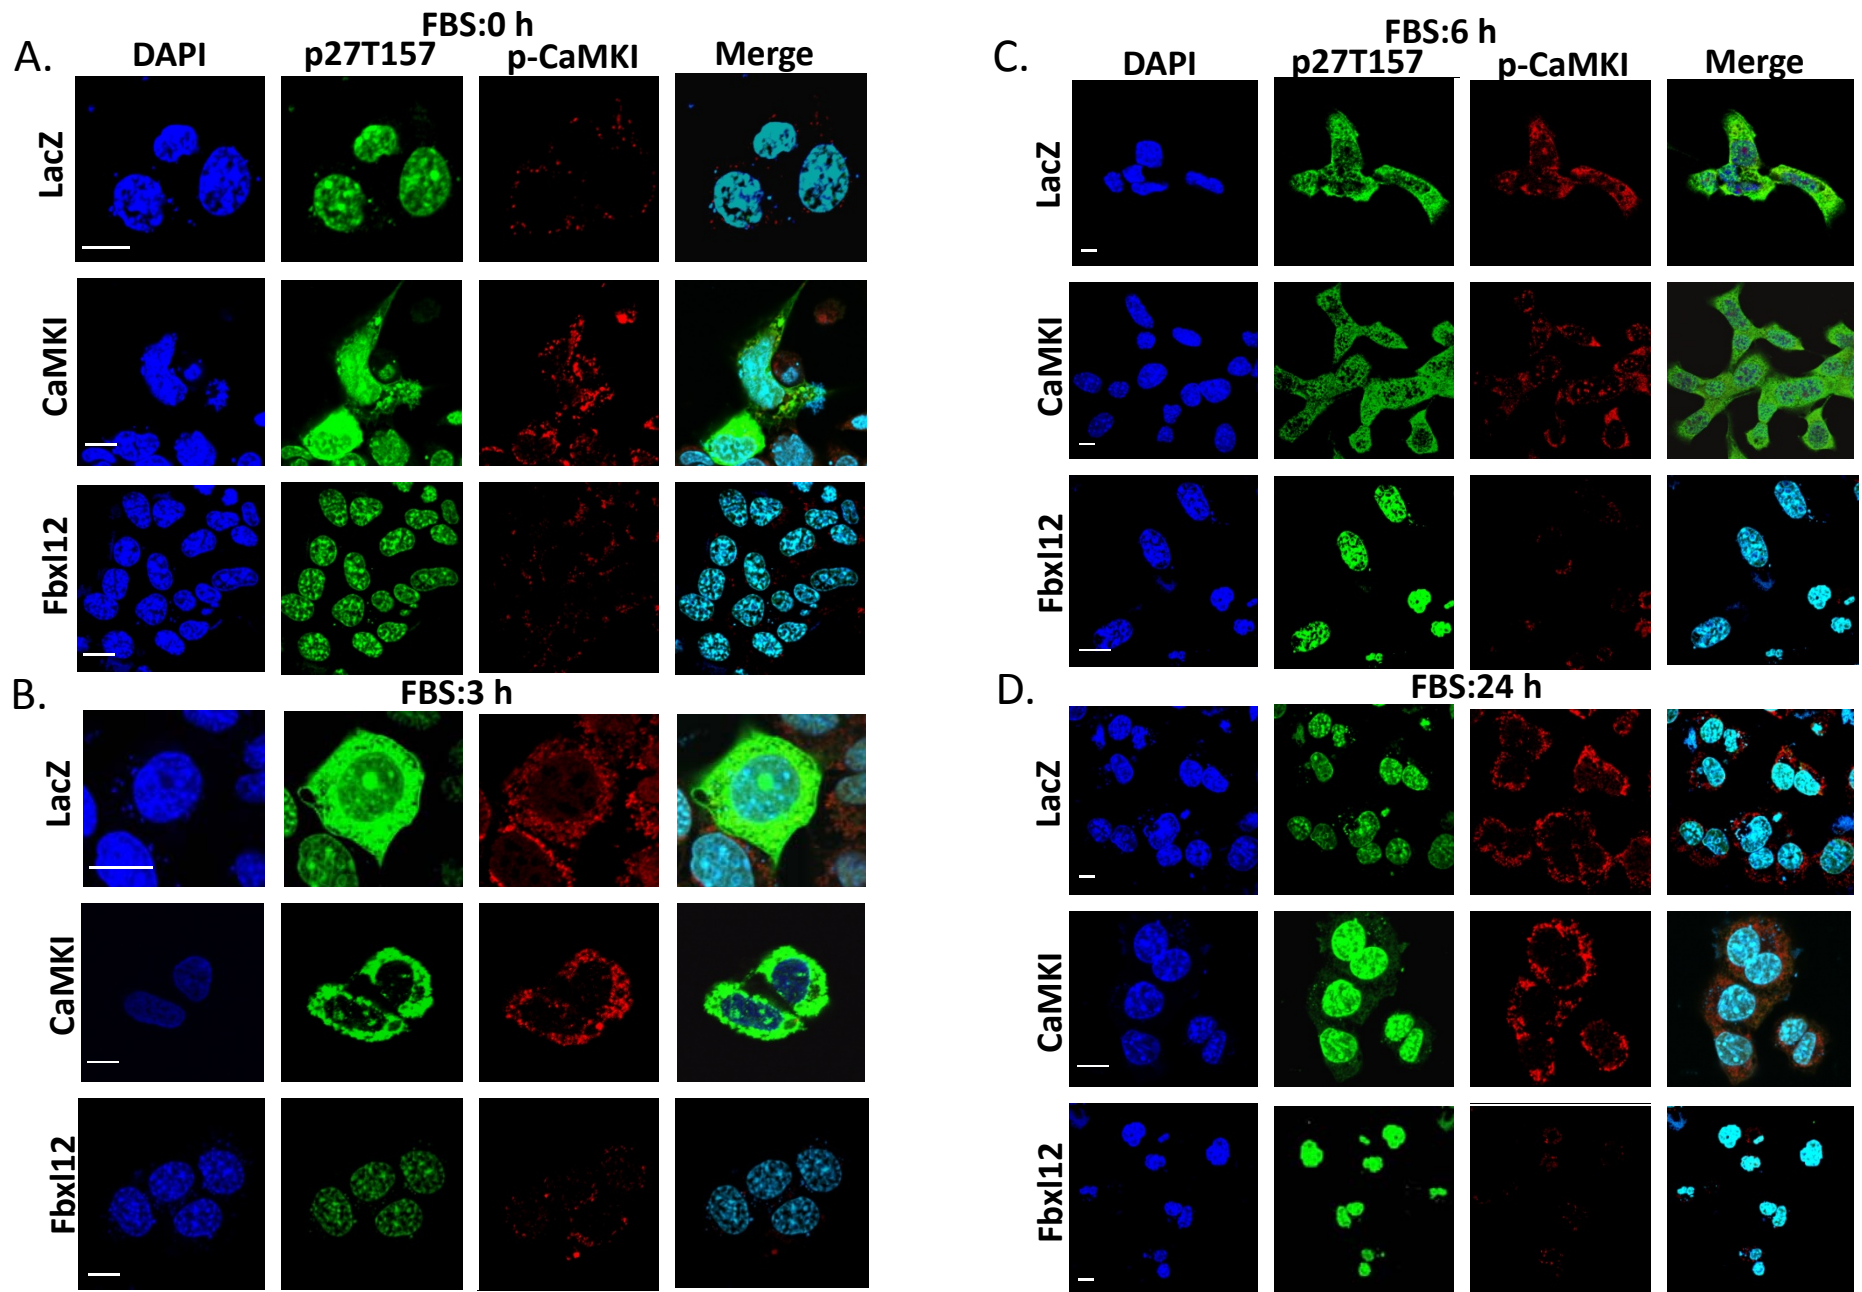

**Supplemental figure 2. Fbxl12/CaMKI-dependent localization of p27T157.** (A-D) A549 cells transfected with LacZ, CaMKI and FBXL12 were synchronized by serum starvation and then released by addition of 10% FBS followed by fixation and processing for immunostaining using p-CaMKI and p27T157 antibodies at indicated times. DAPI was used to visualize the nuclei. Scale bar, 10  $\mu$ m.
