# Supplementary material
Source: PubMed Central journal article supplement (PMC3905573)
Supplement: NIHMS526024-supplement-04.pdf [file NIHMS526024-supplement-04.pdf]

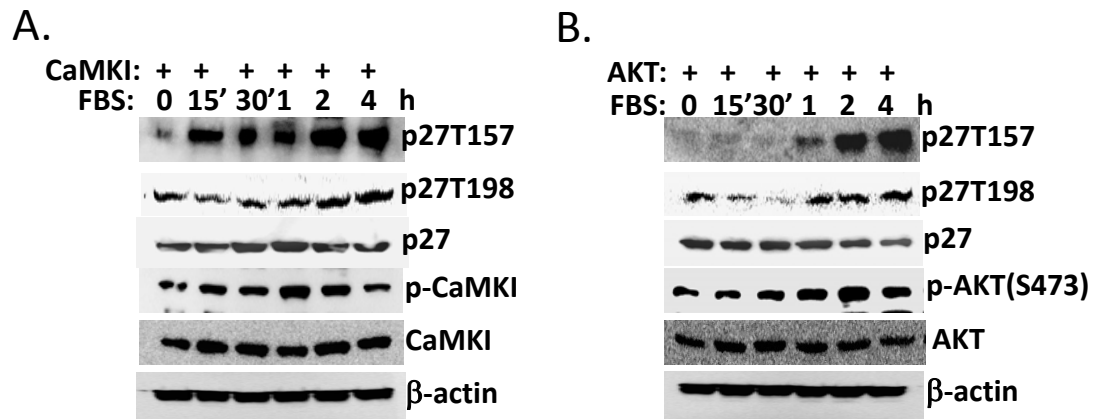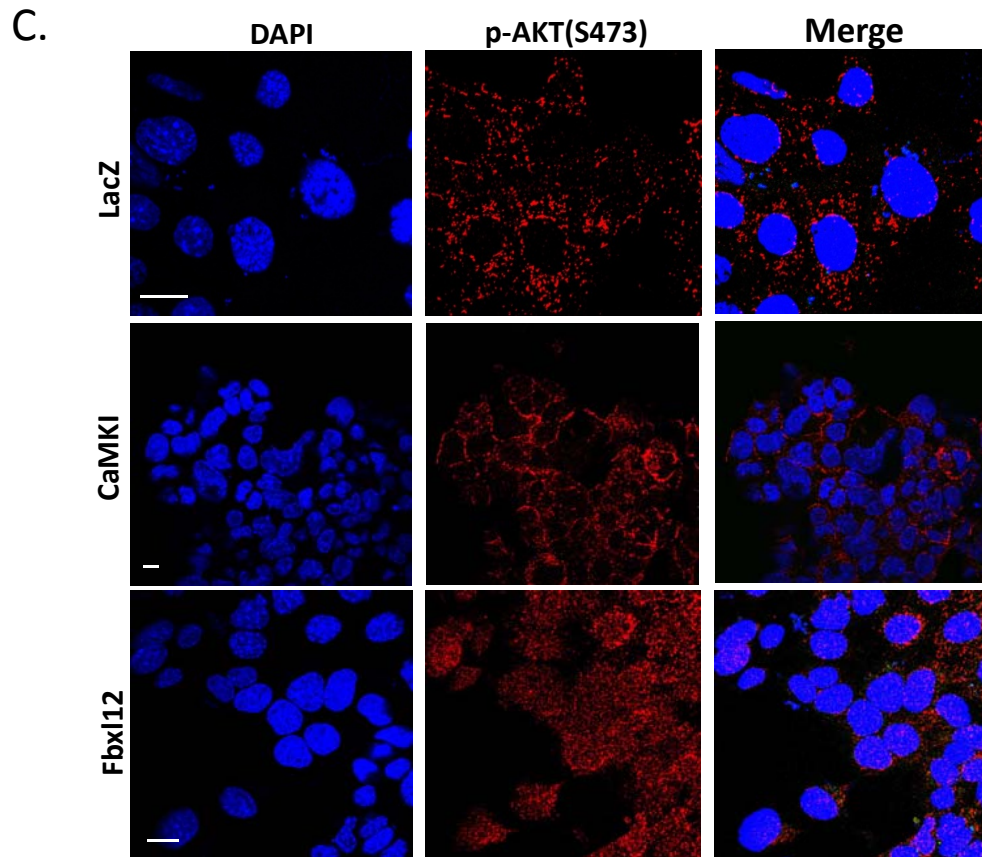

**Supplemental figure 4. CaMKI- or AKT- dependent regulation of p27.** (A-B) A549 cells were transfected with *CaMKI* or *AKT* plasmids. Cells were then starved by serum depletion and released in 48 hours with addition of 10% FBS followed by immunoblot analysis with appropriate antibodies. (C) Fbx12 regulates AKT localization. MLE cells transfected with LacZ, CaMKI and Fbx12 were synchronized by serum starvation and then released with addition of 10% FBS followed by fixation in 6 hours and processing for immunostaining using p-AKT (AKTS473) antibody. DAPI was used to visualize the nuclei.
